# Supplementary material
Source: Springer Nature journal article supplement (https://www.springermedizin.de/resource/supplementary/13019_2010_250_MOESM2_ESM.pdf/9638222)

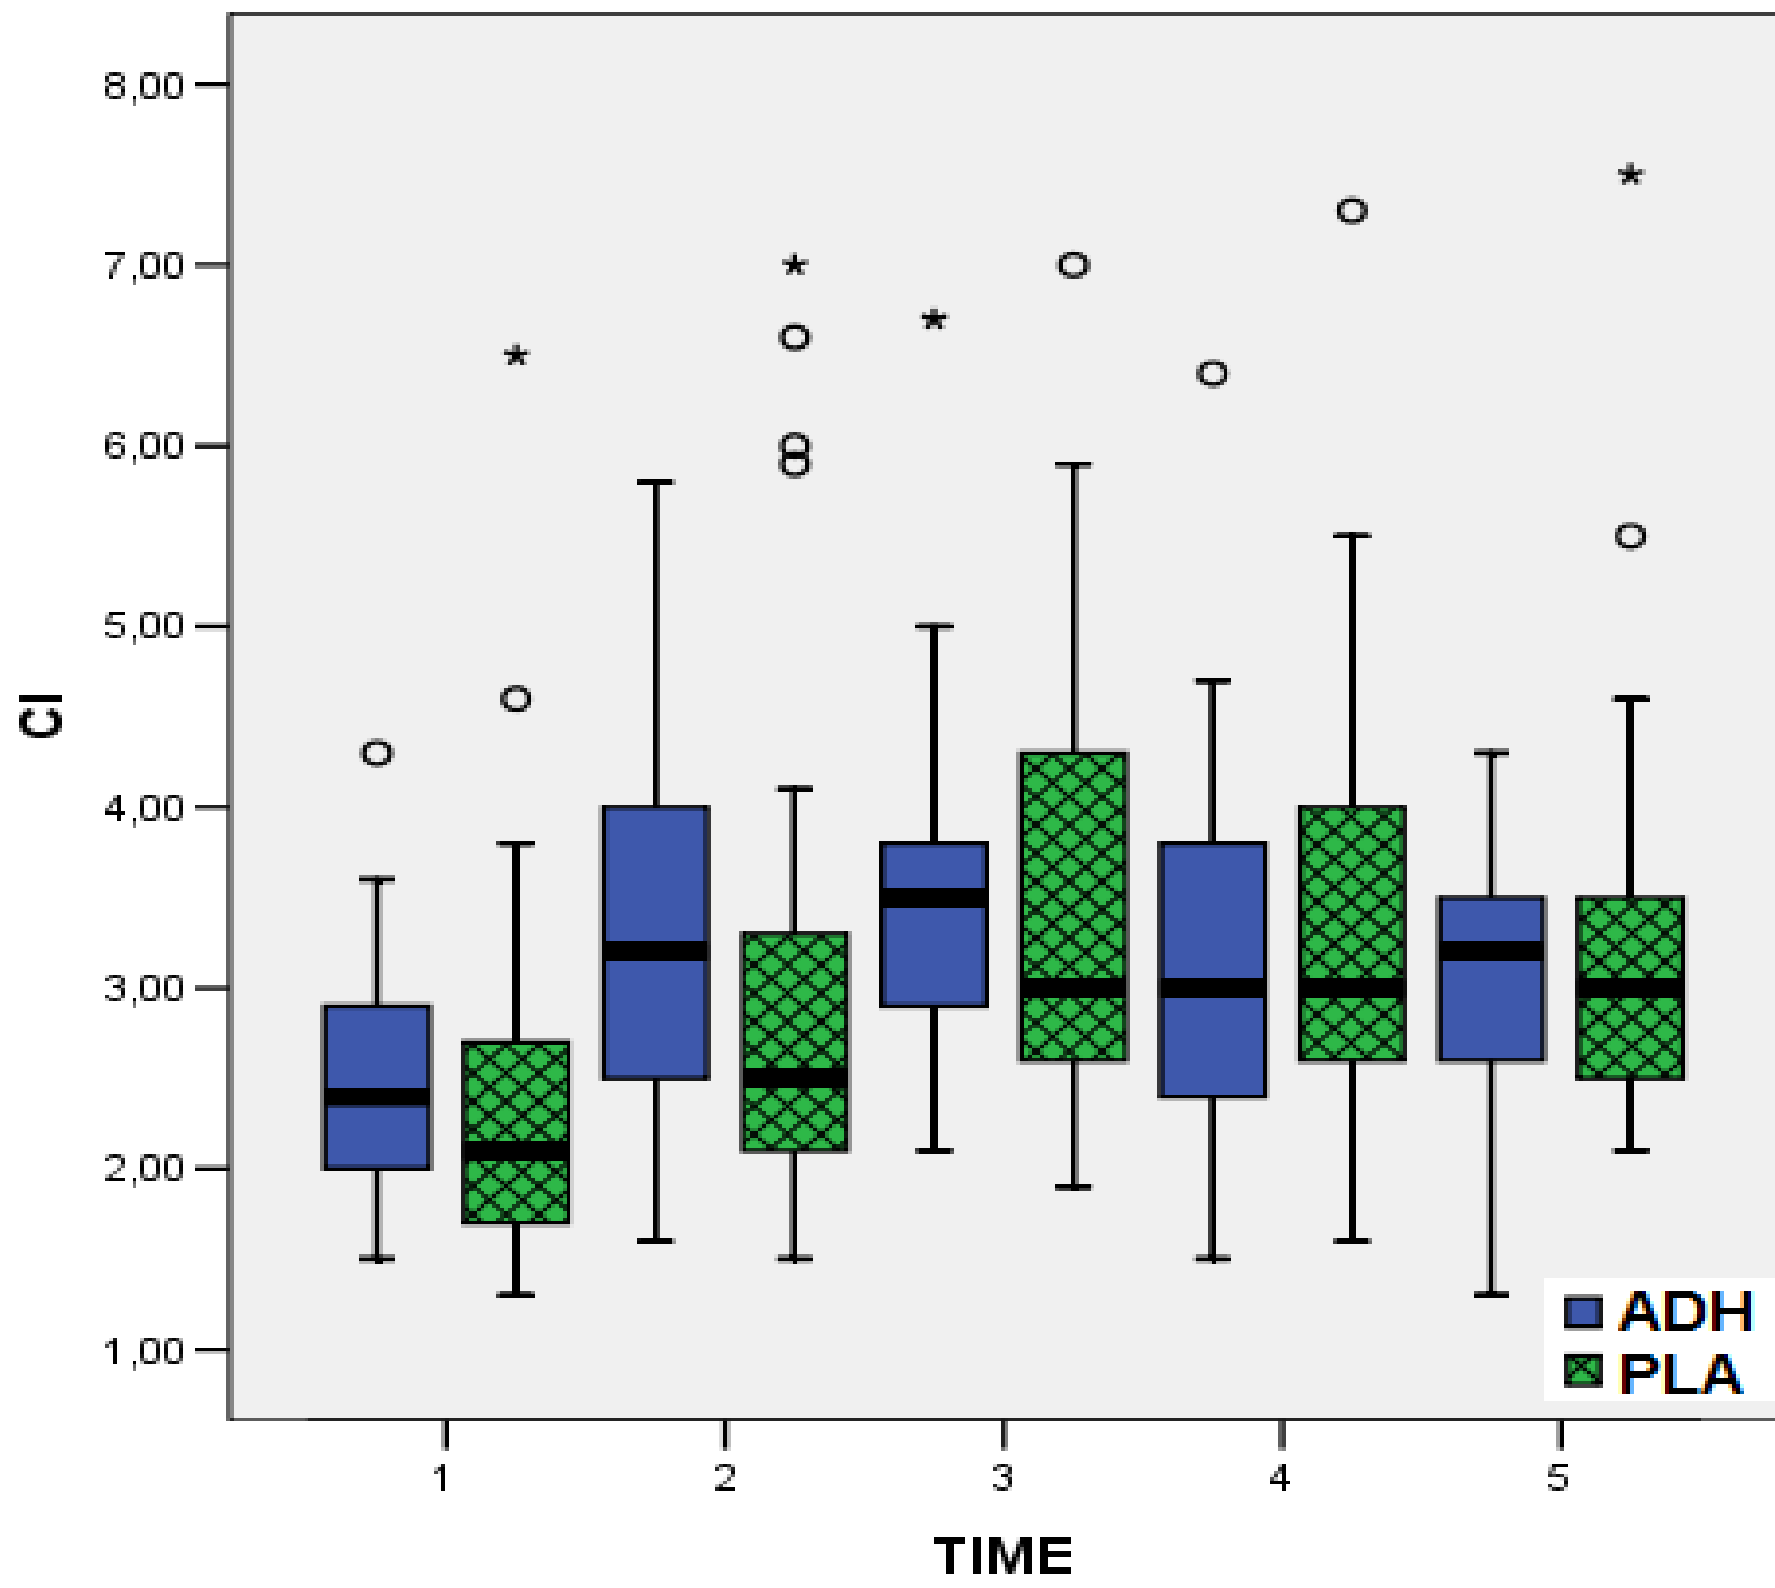

Supplement: MOESM2 [file 9638222]
